# Supplementary material for: Suppression of reversible photocyclization reaction induced fluorescence enhancement: a theoretical study
Source: Royal Society of Chemistry journal article supplement (doi:10.1039/d2cp03448d), 2022-01-01
Supplement: d2cp03448d1.pdf [file d2cp03448d1.pdf]

## Supporting Information

### Suppression of Reversible Photocyclization Reaction Induced Fluorescence

#### Enhancement: A Theoretical Study

Haoran Wei,<sup>a</sup> Yi Zeng, Quansong Li\*<sup>a</sup> and Xiaoyan Zheng\*<sup>a,b</sup>

<sup>a</sup>Key Laboratory of Cluster Science of Ministry of Education, Beijing Key Laboratory of Photoelectronic/Electro-photon Conversion Materials, School of Chemistry and Chemical Engineering, Beijing Institute of Technology, Beijing, 100081, China.

<sup>b</sup>Guangdong Provincial Key Laboratory of Luminescence from Molecular Aggregates (South China University of Technology), Guangzhou 510640, China

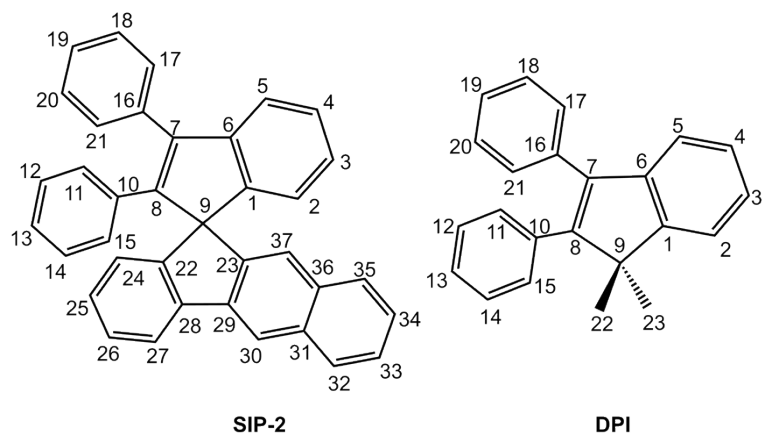

**Chart S1.** Chemical Structure of SIP-2 and DPI.

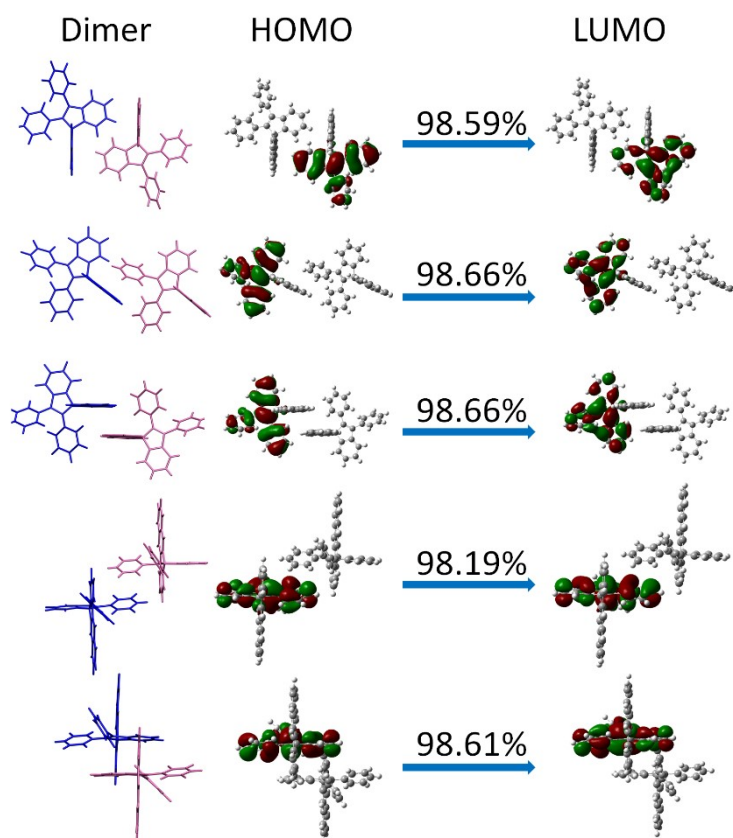

**Fig. S1.** The HOMO and LUMO orbitals of representative dimers of SIP-2.

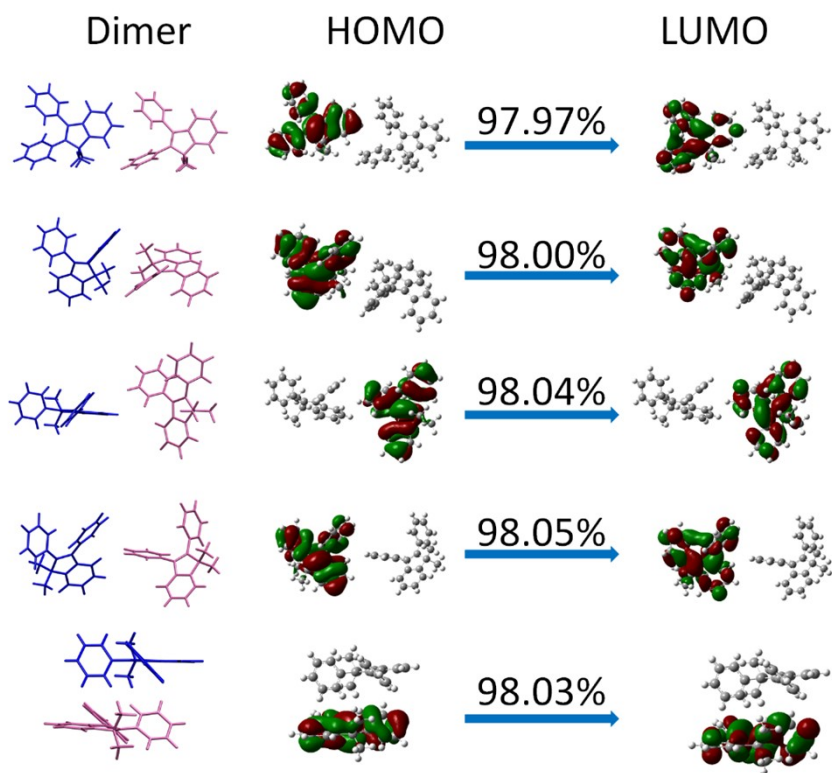

**Fig. S2.** The HOMO and LUMO orbitals of representative dimers of DPI.

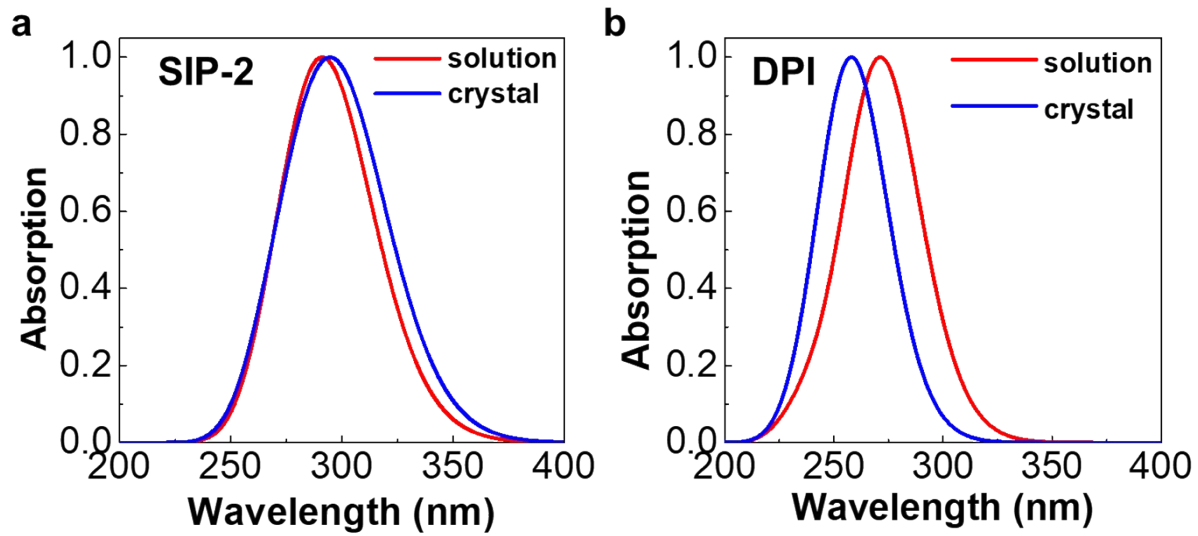

Fig. S3. Calculated absorption spectra of SIP-2 and DPI in solution and crystal state.

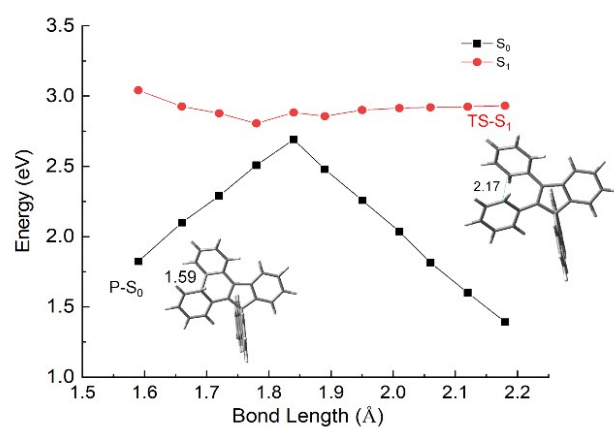

**Fig. S4** Energy profiles along the SIP-2-TS  $-(S_1/S_0)_x$  reaction coordinate obtained with the TD-M062X approaches.

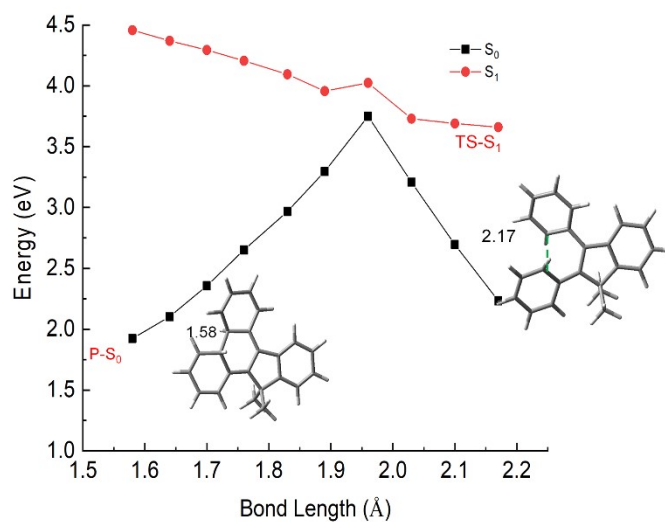

**Fig. S5** Energy profiles along the DPI-TS  $-(S_1/S_0)_x$  reaction coordinate obtained with the TD-M062X approaches.

**Table S1.** The calculated absorption and emission wavelength of SIP-2 in THF solution by using PCM model at several different functionals with basis set 6-31G\*\*, respectively.

|                                   | Absorption                                  | Emission                                    |
|-----------------------------------|---------------------------------------------|---------------------------------------------|
| Experimental results <sup>1</sup> | 3.92 eV/316 nm                              | 2.92 eV/425 nm                              |
| B3LYP                             | 3.57 eV/348 nm $f=0.0632$                   | 2.51 eV/493 nm $f=0.4208$                   |
| BMK                               | 4.03 eV/308 nm $f=0.3844$                   | 2.65 eV/468 nm $f=0.4697$                   |
| BHandHLYP                         | 4.33 eV/286 nm $f=0.4282$                   | 2.69 eV/461 nm $f=0.4913$                   |
| <b>M06-2X</b>                     | <b>4.16 eV/298 nm <math>f=0.4075</math></b> | <b>2.68 eV/461 nm <math>f=0.4542</math></b> |
| M06-HF                            | 3.69 eV/336 nm $f=0.1969$                   | 2.44 eV/508 nm $f=0.4186$                   |
| CAM-B3LYP                         | 4.28 eV/289 nm $f=0.3533$                   | 2.68 eV/462 nm $f=0.4767$                   |
| $\omega$ B97XD                    | 4.29 eV/289 nm $f=0.3949$                   | 2.68 eV/462 nm $f=0.4723$                   |



**Table S2.** Selected bonds (Å), angles (°) and dihedral angles (°) of DPI and SIP-2 in both aggregate and solution phases at the S<sub>0</sub> (S<sub>1</sub>) Minimum.

|                                                                  | DPI            |                |                                         |                |                |                                         | SIP-2          |                |                                         |                |                |                                         |
|------------------------------------------------------------------|----------------|----------------|-----------------------------------------|----------------|----------------|-----------------------------------------|----------------|----------------|-----------------------------------------|----------------|----------------|-----------------------------------------|
|                                                                  | Solution       |                |                                         | Crystal        |                |                                         | Solution       |                |                                         | Crystal        |                |                                         |
|                                                                  | S <sub>0</sub> | S <sub>1</sub> | \Delta(S <sub>0</sub> -S <sub>1</sub> ) | S <sub>0</sub> | S <sub>1</sub> | \Delta(S <sub>0</sub> -S <sub>1</sub> ) | S <sub>0</sub> | S <sub>1</sub> | \Delta(S <sub>0</sub> -S <sub>1</sub> ) | S <sub>0</sub> | S <sub>1</sub> | \Delta(S <sub>0</sub> -S <sub>1</sub> ) |
| C <sub>1</sub> -C <sub>6</sub>                                   | 1.48           | 1.43           | 0.05                                    | 1.48           | 1.43           | 0.05                                    | 1.48           | 1.44           | 0.04                                    | 1.48           | 1.44           | 0.04                                    |
| C <sub>2</sub> -C <sub>9</sub>                                   | 1.48           | 1.41           | 0.07                                    | 1.48           | 1.41           | 0.07                                    | 1.48           | 1.41           | 0.07                                    | 1.48           | 1.42           | 0.06                                    |
| C <sub>1</sub> -C <sub>2</sub>                                   | 1.35           | 1.46           | 0.11                                    | 1.35           | 1.46           | 0.11                                    | 1.36           | 1.46           | 0.10                                    | 1.36           | 1.46           | 0.10                                    |
| C <sub>2</sub> -C <sub>3</sub>                                   | 1.52           | 1.52           | 0.00                                    | 1.53           | 1.53           | 0.00                                    | 1.53           | 1.52           | 0.01                                    | 1.53           | 1.53           | 0.00                                    |
| C <sub>1</sub> -C <sub>5</sub>                                   | 1.48           | 1.43           | 0.05                                    | 1.48           | 1.43           | 0.05                                    | 1.48           | 1.43           | 0.05                                    | 1.48           | 1.43           | 0.05                                    |
| C <sub>6</sub> -C <sub>1</sub> -C <sub>2</sub>                   | 127.0          | 125.2          | 1.89                                    | 130.0          | 127.1          | 2.9                                     | 127.4          | 125.0          | 2.4                                     | 130.0          | 127.0          | 3.0                                     |
| C <sub>6</sub> -C <sub>1</sub> -C <sub>5</sub>                   | 124.0          | 126.4          | 2.4                                     | 120.3          | 123.6          | 3.3                                     | 123.2          | 126.6          | 3.4                                     | 120.3          | 123.1          | 2.8                                     |
| C <sub>2</sub> -C <sub>1</sub> -C <sub>5</sub>                   | 109.0          | 108.0          | 1.0                                     | 108.7          | 108.3          | 0.4                                     | 109.4          | 107.9          | 1.5                                     | 109.5          | 108.3          | 1.2                                     |
| C <sub>7</sub> -C <sub>6</sub> -C <sub>1</sub>                   | 120.9          | 120.4          | 0.5                                     | 121.1          | 121.2          | 0.1                                     | 120.6          | 120.2          | 0.4                                     | 120.6          | 120.4          | 0.2                                     |
| C <sub>8</sub> -C <sub>6</sub> -C <sub>1</sub>                   | 120.4          | 122.2          | 1.8                                     | 120.3          | 121.4          | 1.1                                     | 120.5          | 122.3          | 1.8                                     | 120.3          | 121.6          | 1.3                                     |
| C <sub>10</sub> -C <sub>9</sub> -C <sub>2</sub>                  | 119.5          | 121.7          | 1.2                                     | 121.0          | 119.5          | 1.5                                     | 119.5          | 122.0          | 2.5                                     | 121.1          | 123.0          | 1.9                                     |
| C <sub>15</sub> -C <sub>9</sub> -C <sub>2</sub>                  | 121.8          | 122.2          | 0.4                                     | 120.4          | 123.7          | 3.3                                     | 122.0          | 121.2          | 0.8                                     | 121.0          | 120.3          | 0.7                                     |
| C <sub>11</sub> -C <sub>9</sub> -C <sub>8</sub>                  | 126.1          | 124.8          | 1.3                                     | 126.1          | 123.4          | 2.7                                     | 127.2          | 126.4          | 0.8                                     | 129.2          | 128.0          | 1.2                                     |
| C <sub>9</sub> -C <sub>2</sub> -C <sub>3</sub>                   | 122.3          | 125.1          | 2.9                                     | 122.3          | 124.3          | 2.0                                     | 122.0          | 124.0          | 2.0                                     | 120.9          | 122.1          | 1.3                                     |
| C <sub>1</sub> -C <sub>2</sub> -C <sub>3</sub>                   | 111.3          | 109.5          | 1.8                                     | 111.6          | 110.6          | 1.0                                     | 110.5          | 109.3          | 1.2                                     | 110.0          | 109.6          | 0.4                                     |
| C <sub>7</sub> -C <sub>6</sub> -C <sub>1</sub> -C <sub>2</sub>   | 45.6           | 27.1           | 18.5                                    | 45.4           | 26.5           | 18.9                                    | 48.0           | 28.0           | 20.0                                    | 51.3           | 32.7           | 18.6                                    |
| C <sub>10</sub> -C <sub>9</sub> -C <sub>2</sub> -C <sub>1</sub>  | 60.3           | 16.0           | 44.3                                    | 73.6           | 32.8           | 40.8                                    | 41.7           | 14.4           | 27.3                                    | 29.5           | 14.7           | 14.8                                    |
| C <sub>13</sub> -C <sub>12</sub> -C <sub>3</sub> -C <sub>2</sub> |                |                |                                         |                |                |                                         | 123.8          | 130.2          | 6.4                                     | 129.4          | 131.4          | 2.0                                     |

**Table S3.** Reorganization energies ( $\lambda=\lambda_{gs} + \lambda_{es}$ ) were obtained for SIP-2 and DPI in both solution and crystal states at M06-2X/6-31G(d,p) level by AP method. (Energy unit: meV)

| SIP-2 | In solution    |                |           | In crystal state |                |           |
|-------|----------------|----------------|-----------|------------------|----------------|-----------|
|       | $\lambda_{gs}$ | $\lambda_{es}$ | $\lambda$ | $\lambda_{gs}$   | $\lambda_{es}$ | $\lambda$ |
| AP    | 660            | 810            | 1470      | 510              | 560            | 1070      |
| NM    | 680            | 910            | 1590      | 600              | 630            | 1230      |
| DPI   | $\lambda_{gs}$ | $\lambda_{es}$ | $\lambda$ | $\lambda_{gs}$   | $\lambda_{es}$ | $\lambda$ |
| AP    | 720            | 1110           | 1830      | 640              | 940            | 1580      |
| NM    | 946            | 2126           | 3072      | 911              | 1387           | 2298      |

**Table S4.** Selected internal coordinate (IC) with reorganization energies ( $\lambda_i > 1$  meV) for SIP-2 in both solution and crystalline states.

| In solution                          |                   | In crystalline state                 |                   |
|--------------------------------------|-------------------|--------------------------------------|-------------------|
| ICR                                  | $\lambda_i$ (meV) | ICR                                  | $\lambda_i$ (meV) |
| <b>C7-C8-C10-C11 (D<sub>2</sub>)</b> | <b>115.56</b>     | C7-C8                                | 113.19            |
| C7-C8                                | 111.00            | C8-C10                               | 65.10             |
| <b>C9-C8-C10-C11</b>                 | <b>109.33</b>     | C8-C7-C16-C21                        | 54.28             |
| C9-C8-C10-C15                        | 96.25             | C6-C7                                | 42.55             |
| C8-C10                               | 91.71             | C8-C7-C16-C17                        | 34.59             |
| C7-C8-C10-C15                        | 90.48             | <b>C9-C8-C10-C11</b>                 | <b>33.56</b>      |
| C8-C7-C16-C21                        | 55.57             | C6-C7-C16-C21                        | 30.08             |
| C8-C7-C16-C17                        | 37.93             | <b>C7-C8-C10-C11 (D<sub>2</sub>)</b> | <b>25.89</b>      |
| C6-C7                                | 37.63             | C7-C16                               | 22.76             |
| C6-C7-C16-C21                        | 31.64             | C7-C8-C10-C11                        | 20.28             |
| C7-C16                               | 27.22             | C6-C7-C16-C17                        | 16.78             |
| C6-C7-C16-C17                        | 20.90             | C1-C6                                | 15.34             |
| C10-C11                              | 14.42             | C9-C8-C10-C15                        | 14.56             |
| C1-C6                                | 13.29             | C13-C14                              | 12.22             |
| C6-C7-C16                            | 12.28             | C6-C7-C16                            | 10.74             |
| C10-C15                              | 11.80             | C10-C15                              | 10.20             |
| C6-C1-C9-C22                         | 8.38              | C5-C6                                | 7.50              |
| C5-C6                                | 7.74              | C8-C7-C16                            | 7.18              |
| C8-C9-C22-C27                        | 7.56              | C3-C4                                | 5.73              |
| C6-C1-C9-C8                          | 7.23              | C6-C1-C9                             | 4.47              |
| C8-C7-C16                            | 6.21              | C9-C8-C10                            | 4.16              |
| C13-C14                              | 5.54              | C13-C14                              | 4.11              |
| C9-C8-C10                            | 4.58              | C5-C6-C7-C8                          | 3.98              |
| C14-C15                              | 4.57              | C14-C15                              | 3.64              |
| C2-C1-C9-C22                         | 4.49              | C8-C9-C23                            | 3.59              |
| C16-C21                              | 4.38              | C4-C5                                | 3.50              |
| C8-C9-C23-C29                        | 4.21              | C16-C17                              | 3.29              |
| C3-C4                                | 4.20              | C16-C21                              | 3.24              |
| C2-C1-C9-C8                          | 4.04              | C8-C9-C22-C24                        | 2.92              |
| C16-C17                              | 3.80              | C1-C6-C5                             | 2.77              |
| C6-C1-C9-C23                         | 3.66              | C7-C8-C10                            | 2.76              |
| C8-C9-C23-C29                        | 3.37              | C8-C9-C22-C28                        | 2.74              |
| C8-C9-C22-C24                        | 3.27              | C2-C1-C9-C23                         | 2.59              |
| C1-C6-C5                             | 3.03              | C1-C9-C8                             | 2.16              |
| C4-C5                                | 2.97              | C6-C1-C9-C22                         | 1.66              |
| C6-C1-C9                             | 2.87              | C18-C19                              | 1.54              |
| C6-C7-C8-C9                          | 2.67              | C2-C1-C9                             | 1.49              |
| C7-C16-C17                           | 2.62              | C17-C16-C21-C20                      | 1.48              |
| C1-C9-C8                             | 2.60              | C7-C8-C9-C22                         | 1.27              |
| C7-C8-C9-C22                         | 2.44              | C1-C6-C7                             | 1.21              |
| C8-C9                                | 1.80              | C7-C16-C17                           | 1.16              |
| C18-C19                              | 1.71              | C8-C9                                | 1.08              |

---

|                 |      |          |      |
|-----------------|------|----------|------|
| C7-C8-C10       | 1.64 | C6-C7-C8 | 1.01 |
| C6-C7-C8        | 1.51 |          |      |
| C8-C10-C11      | 1.27 |          |      |
| C10-C8-C9-C22   | 1.20 |          |      |
| C17-C18         | 1.19 |          |      |
| C2-C1-C9        | 1.13 |          |      |
| C17-C16-C21-C20 | 1.04 |          |      |

---

**Table S5.** Selected IC with reorganization energies ( $\lambda_i > 1$  meV) for DPI in both solution and crystalline states.

| In solution                          |                   | In crystalline state                 |                   |
|--------------------------------------|-------------------|--------------------------------------|-------------------|
| ICR                                  | $\lambda_i$ (meV) | ICR                                  | $\lambda_i$ (meV) |
| <b>C7-C8-C10-C11 (D<sub>2</sub>)</b> | <b>418.71</b>     | <b>C7-C8-C10-C11 (D<sub>2</sub>)</b> | <b>305.09</b>     |
| <b>C7-C8-C10-C15</b>                 | <b>410.18</b>     | <b>C7-C8-C10-C15</b>                 | <b>251.79</b>     |
| <b>C9-C8-C10-C11</b>                 | <b>390.39</b>     | <b>C9-C8-C10-C11</b>                 | <b>196.09</b>     |
| <b>C9-C8-C10-C15</b>                 | <b>382.10</b>     | <b>C9-C8-C10-C15</b>                 | <b>159.48</b>     |
| C7-C8                                | 100.28            | C7-C8                                | 123.91            |
| C8-C9                                | 99.14             | C8-C7-C16-C21                        | 72.41             |
| C10-C8-C9-C23                        | 70.15             | C8-C9                                | 54.55             |
| C10-C8-C9-C22                        | 59.88             | C8-C7-C16-C17                        | 50.03             |
| C8-C7-C16-C21                        | 58.67             | C6-C7-C16-C21                        | 45.11             |
| C7-C8-C9-C23                         | 49.26             | C6-C7                                | 43.94             |
| C7-C8-C9-C22                         | 41.68             | C7-C16                               | 29.22             |
| C6-C7-C16-C21                        | 39.37             | C6-C7-C16-C17                        | 28.18             |
| C7-C8-C16-C17                        | 33.05             | C6-C1                                | 11.68             |
| C6-C7                                | 31.77             | C10-C8-C9                            | 11.45             |
| C7-C16                               | 29.57             | C10-C8-C7                            | 9.82              |
| C6-C7-C16-C17                        | 24.48             | C6-C1-H9-C22                         | 9.20              |
| C10-C11                              | 15.01             | C5-C6                                | 8.36              |
| C10-C15                              | 14.44             | C16-C7-C6                            | 6.84              |
| C9-C8-C10                            | 14.43             | C8-C7-C16                            | 6.26              |
| C6-C1-C9-C8                          | 13.76             | C8-C7-C16                            | 5.44              |
| C6-C7-C16                            | 13.52             | C10-C15                              | 5.43              |
| C1-C6                                | 10.53             | C16-C17                              | 5.17              |
| C1-C9-C23                            | 9.43              | C8-C10-C15                           | 5.13              |
| C2-C1-C9-C8                          | 8.87              | C22-C9-C1-C2                         | 4.89              |
| C8-C7-C16                            | 8.78              | C6-C1-C9                             | 4.60              |
| C5-C6                                | 7.48              | C3-C4                                | 4.38              |
| C7-C8-C10                            | 6.84              | C7-C8-C9-C22                         | 4.21              |
| C13-C14                              | 5.21              | C23-C9-C1-C6                         | 3.75              |
| C14-C15                              | 4.64              | C4-C35                               | 3.61              |
| C16-C21                              | 4.53              | C9-C8-C7-C6                          | 3.12              |
| C16-C17                              | 4.43              | C16-C21                              | 2.87              |
| C10-C8-C9-C1                         | 4.31              | C8-C10-C11                           | 2.77              |
| C9-C1-C6-C7                          | 3.24              | C7-C8-C9-C1                          | 2.59              |
| C3-C4                                | 2.96              | C7-C8-C9-C23                         | 2.54              |
| C1-C6-C5                             | 2.45              | C1-C6-C5                             | 2.53              |
| C9-C23                               | 2.42              | C14-C15                              | 2.43              |
| C4-C5                                | 2.25              | C8-C7-C6-C5                          | 2.07              |
| C6-C1-C9                             | 2.02              | C10-C8-C9-C23                        | 2.06              |
| C18-C19                              | 1.92              | C14-C13                              | 2.06              |
| C7-C16-C17                           | 1.66              | C17-C18                              | 1.91              |
| C1-C9-C8                             | 1.55              | C8-C9-C1-C6                          | 1.90              |
| C17-C18                              | 1.52              | C9-C1-C2                             | 1.80              |

---

|                 |      |                 |      |
|-----------------|------|-----------------|------|
| C17-C16-C21-C20 | 1.47 | C7-C8-C9        | 1.78 |
| C11-C12         | 1.39 | C8-C9-C1        | 1.77 |
| C8-C10-C15      | 1.23 | C15-C10-C11-C12 | 1.63 |
|                 |      | C22-C9-C23      | 1.51 |
|                 |      | C12-C11         | 1.50 |
|                 |      | C10-C11         | 1.43 |
|                 |      | C18-C19         | 1.28 |
|                 |      | C23-C9-C1-C2    | 1.20 |
|                 |      | C21-C16-C17-C18 | 1.16 |
|                 |      | C7-C6-C1        | 1.05 |

---

## References

1. Z. Zhou, S. Xie, X. Chen, Y. Tu, J. Xiang, J. Wang, Z. He, Z. Zeng and B. Z. Tang, *J. Am. Chem. Soc.*, 2019, **141**, 9803-9807.
